# Supplementary material for: Degradable redox-responsive disulfide-based nanogel drug carriers via dithiol oxidation polymerization
Source: Royal Society of Chemistry journal article supplement (doi:10.1039/c8bm01120f), 2018-11-12
Supplement: c8bm01120f1.pdf [file c8bm01120f1.pdf]

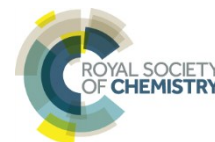

## Biomaterials Science

### ARTICLE

# **Degradable Redox-Responsive Disulfide-Based Nanogel Drug Carriers via Dithiol Oxidation Polymerization**

Sussana A. Elkassih, Petra Kos, Hu Xiong, and Daniel J. Siegwart\*

University of Texas Southwestern Medical Center, Simmons Comprehensive Cancer Center,  
Department of Biochemistry, Dallas, Texas 75390, United States

## Electronic supplementary information (ESI)

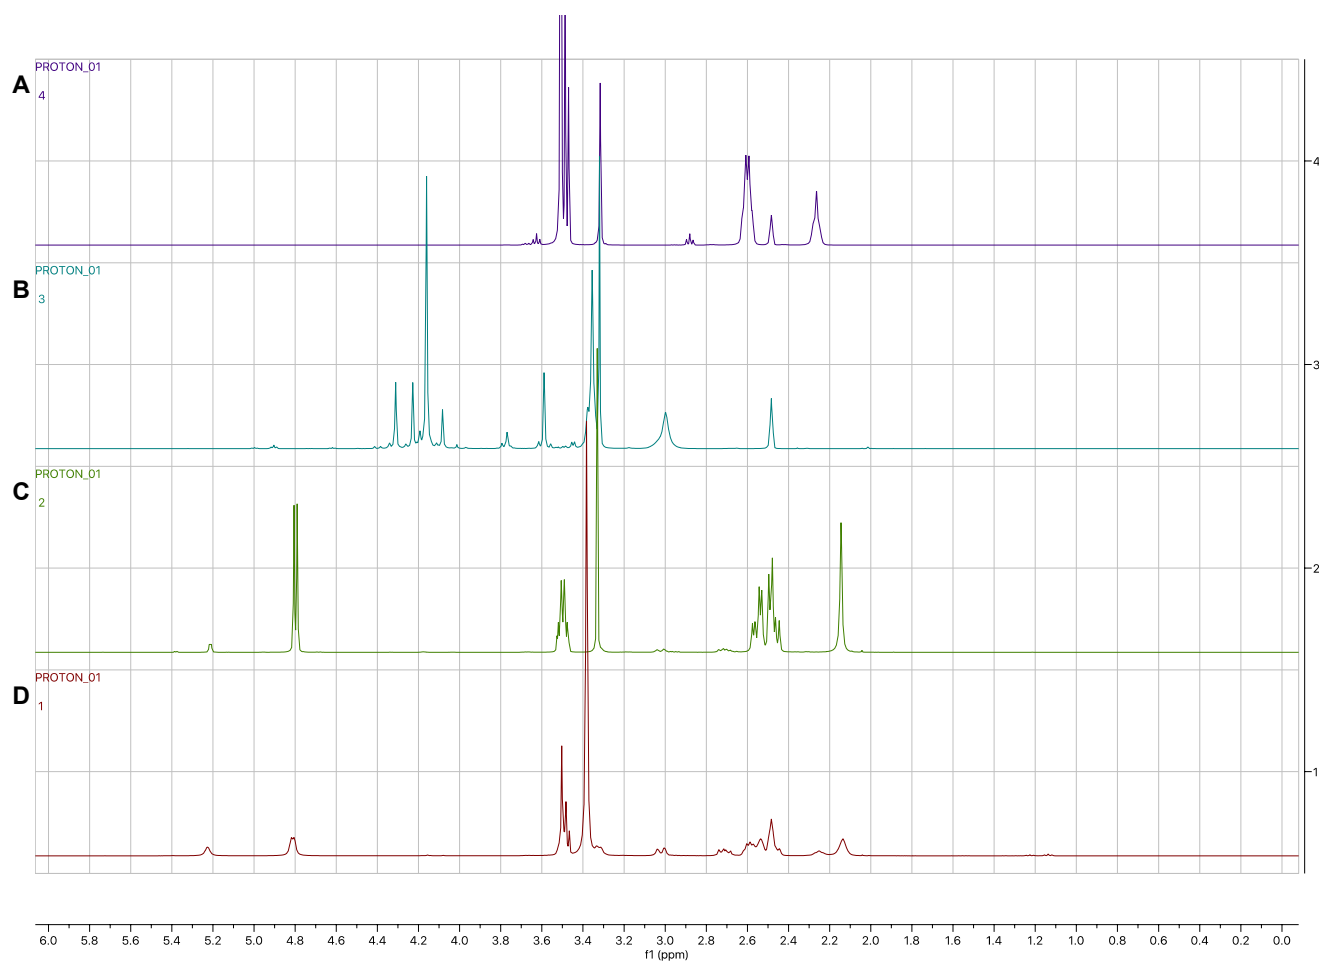

**Figure S1.** (A) 2,2'-(ethylenedioxy)diethanethiol (EDDET)  $\delta$ H(400 MHz; DMSO- $d_6$ ) 2.3 (2 H, m, CH<sub>2</sub>), 2.6 (2 H, m, CH<sub>2</sub>), 3.3 (2H, s, SH), and 3.5 (4 H, m, CH<sub>2</sub>). (B) pentaerythritol tetramercaptoacetate (PETMA)  $\delta$ H(400 MHz; DMSO- $d_6$ ) 3.3 (1 H, s, SH), 3.4 (2 H, s, CH<sub>2</sub>), and 4.2 (2 H, 2, CH<sub>2</sub>). (C) dithiothreitol (DTT)  $\delta$ H(400 MHz; DMSO- $d_6$ ) 2.45 (2 H, m, CH), 2.55 (2 H, m, CH), 3.5 (2 H, s, SH), and 43.5 (2 H, 2, CH). (D) 1:50 monomer:cross-linker (mol/mol) bulk gel incubated with DTT reducing agent (2X free thiol molar equivalence) for 24 hr  $\delta$ H(400 MHz; DMSO- $d_6$ ).

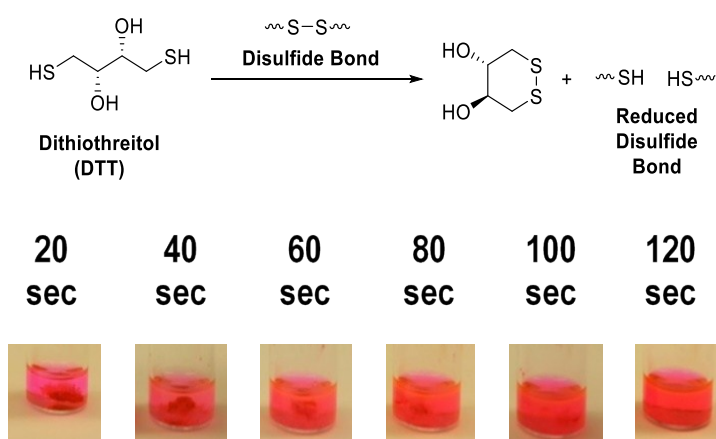

**Figure S2.** PETMA-based bulk hydrogels degraded in response to DTT to release Rhodamine B. All dye molecules were released within two minutes.

| Total Flow Rate (mL/min) | H <sub>2</sub> O <sub>2</sub> wt. % | DLS (nm) | Appearance        | Ratio | Yield  |
|--------------------------|-------------------------------------|----------|-------------------|-------|--------|
| 12                       | 3%                                  | 73       | opaque blue sheen | 1:10  | 22.41% |
| 12                       | 6%                                  | 69       | opaque blue sheen | 1:10  | 27.03% |
| 12                       | 12%                                 | 74       | opaque blue sheen | 1:10  | 40.39% |
| 12                       | 24%                                 | 70       | opaque blue sheen | 1:10  | 27.74% |
| 12                       | 30%                                 | ----     | opaque blue sheen | 1:10  | N/A    |
| nanoprecip.              | 3%                                  | 99       | opaque blue sheen | 1:10  | 28.63% |

Before Dialysis  
PETMA Nanogel = 63 nm

After Dialysis  
PETMA Nanogel = 68 nm

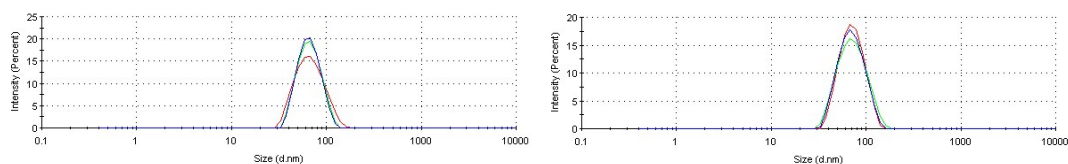

**Figure S3.** Table listing different formulation conditions. Formulated nanogels were prepared using a microfluidic mixing instrument. An organic phase containing monomer, cross-linker, and base dissolved in water:acetone 1:1 (volume) solution was combined with an aqueous phase containing different weight percentages of H<sub>2</sub>O<sub>2</sub>. The ratio of organic:aqueous phase was 1:10 (volume) and the flow rate was 12 mL/min.

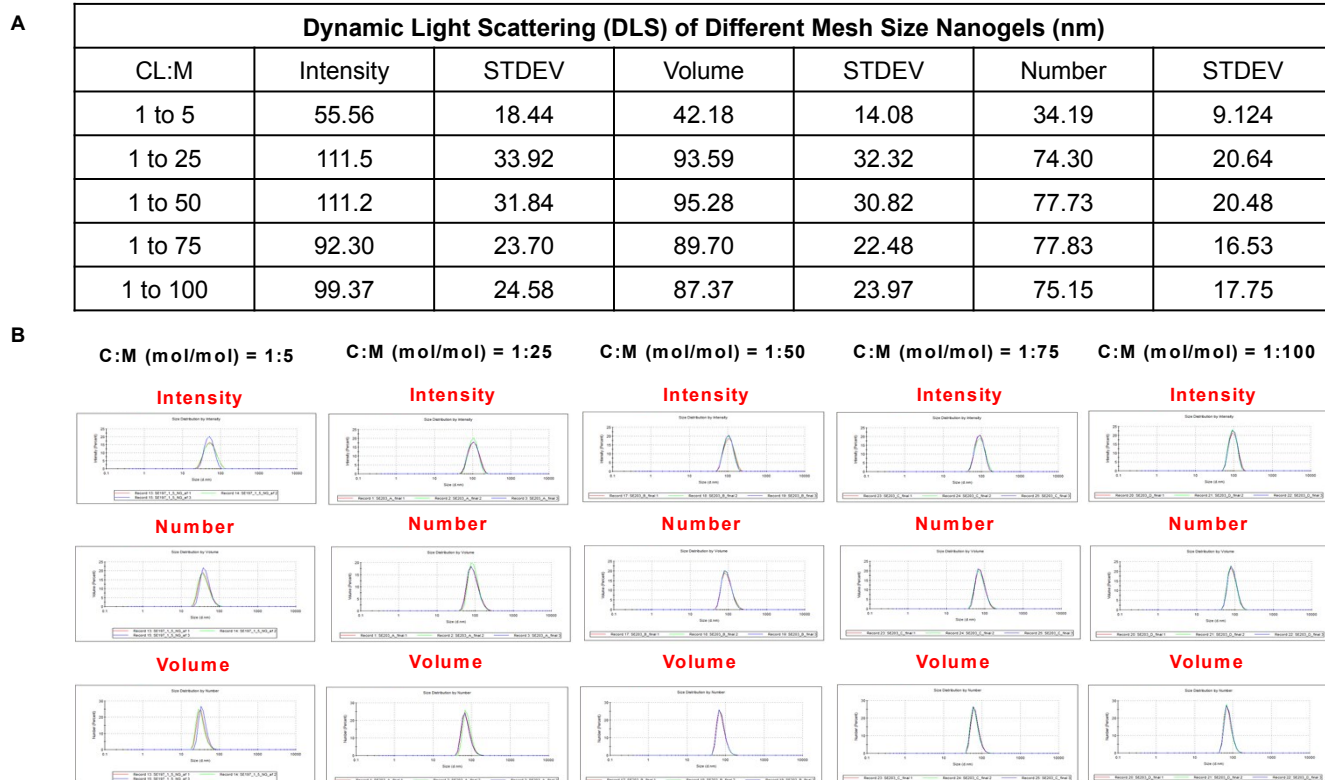

**Figure S4. (A)** Table of particle sizes of different PETMA nanogels of different cross-linking densities after dialysis purification. **(B)** Intensity-, number-, and volume-weighted DLS plots of corresponding nanogels. Formulated nanogels were prepared using a microfluidic mixing instrument. An organic phase containing monomer, cross-linker, and base dissolved in water:acetone 1:1 (volume) solution was combined with an aqueous phase containing 12 wt. % H<sub>2</sub>O<sub>2</sub>. The ratio of organic:aqueous phase was 1:10 (volume) and the flow rate was 12 mL/min. Particle sizes before after dialysis purification were measured by DLS.

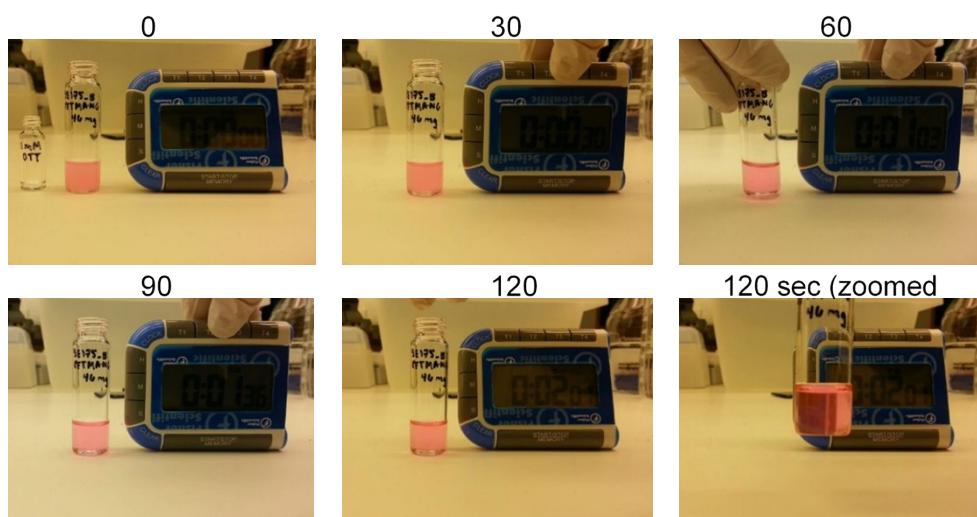

**Figure S5.** Degradation of PETMA, Rhodamine B loaded nanogels after the addition of dithiothreitol (DTT) disulfide bond reducing agent. Degradation occurred in less than two minutes for this sample size (10 mg).

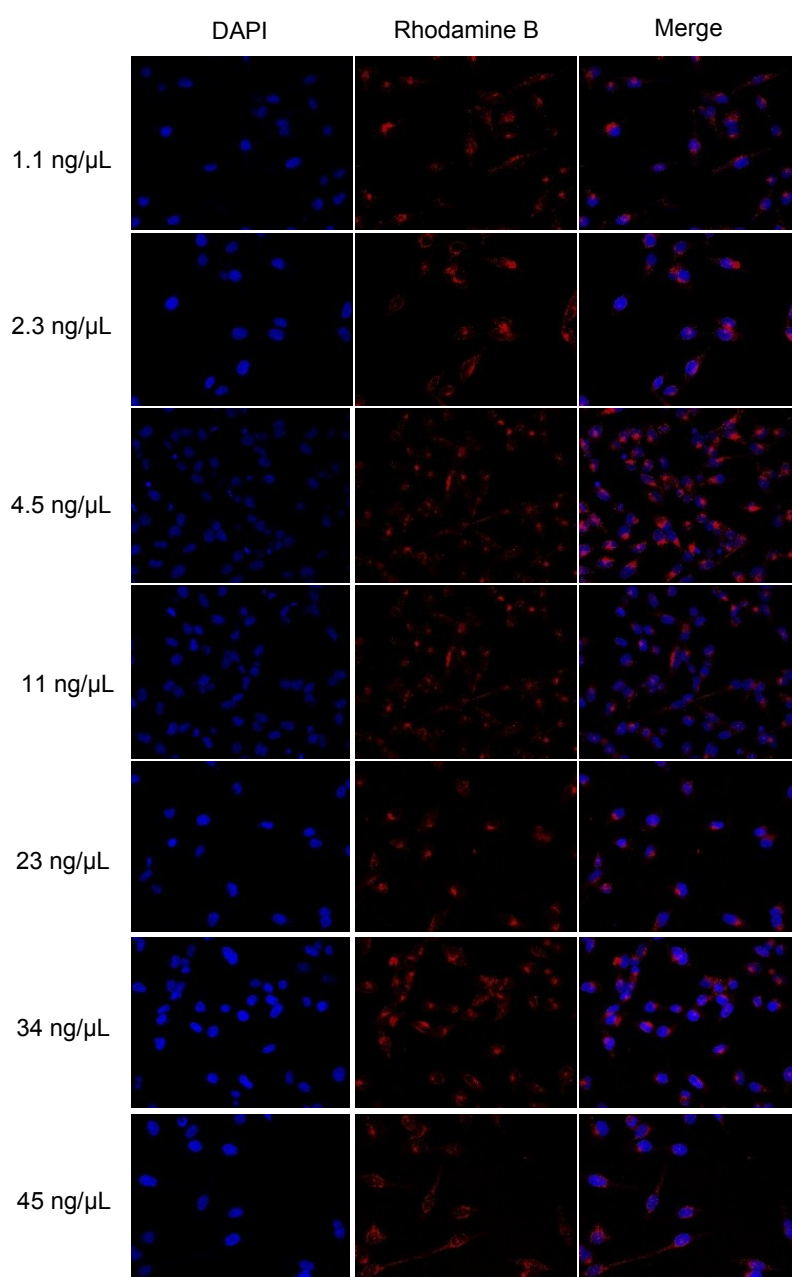

**Figure S6.** The optimum Rhodamine B dye concentration for analysis of cellular uptake was determined by incubating HeLa cells with increasing dye-loaded nanogel concentrations using the 1:25 nanogels for 24 hrs. HeLa cells were fixed using PFA and the nucleus stained with DAPI. Images taken on a confocal microscope at 40X magnification and images were analyzed using ImageJ.

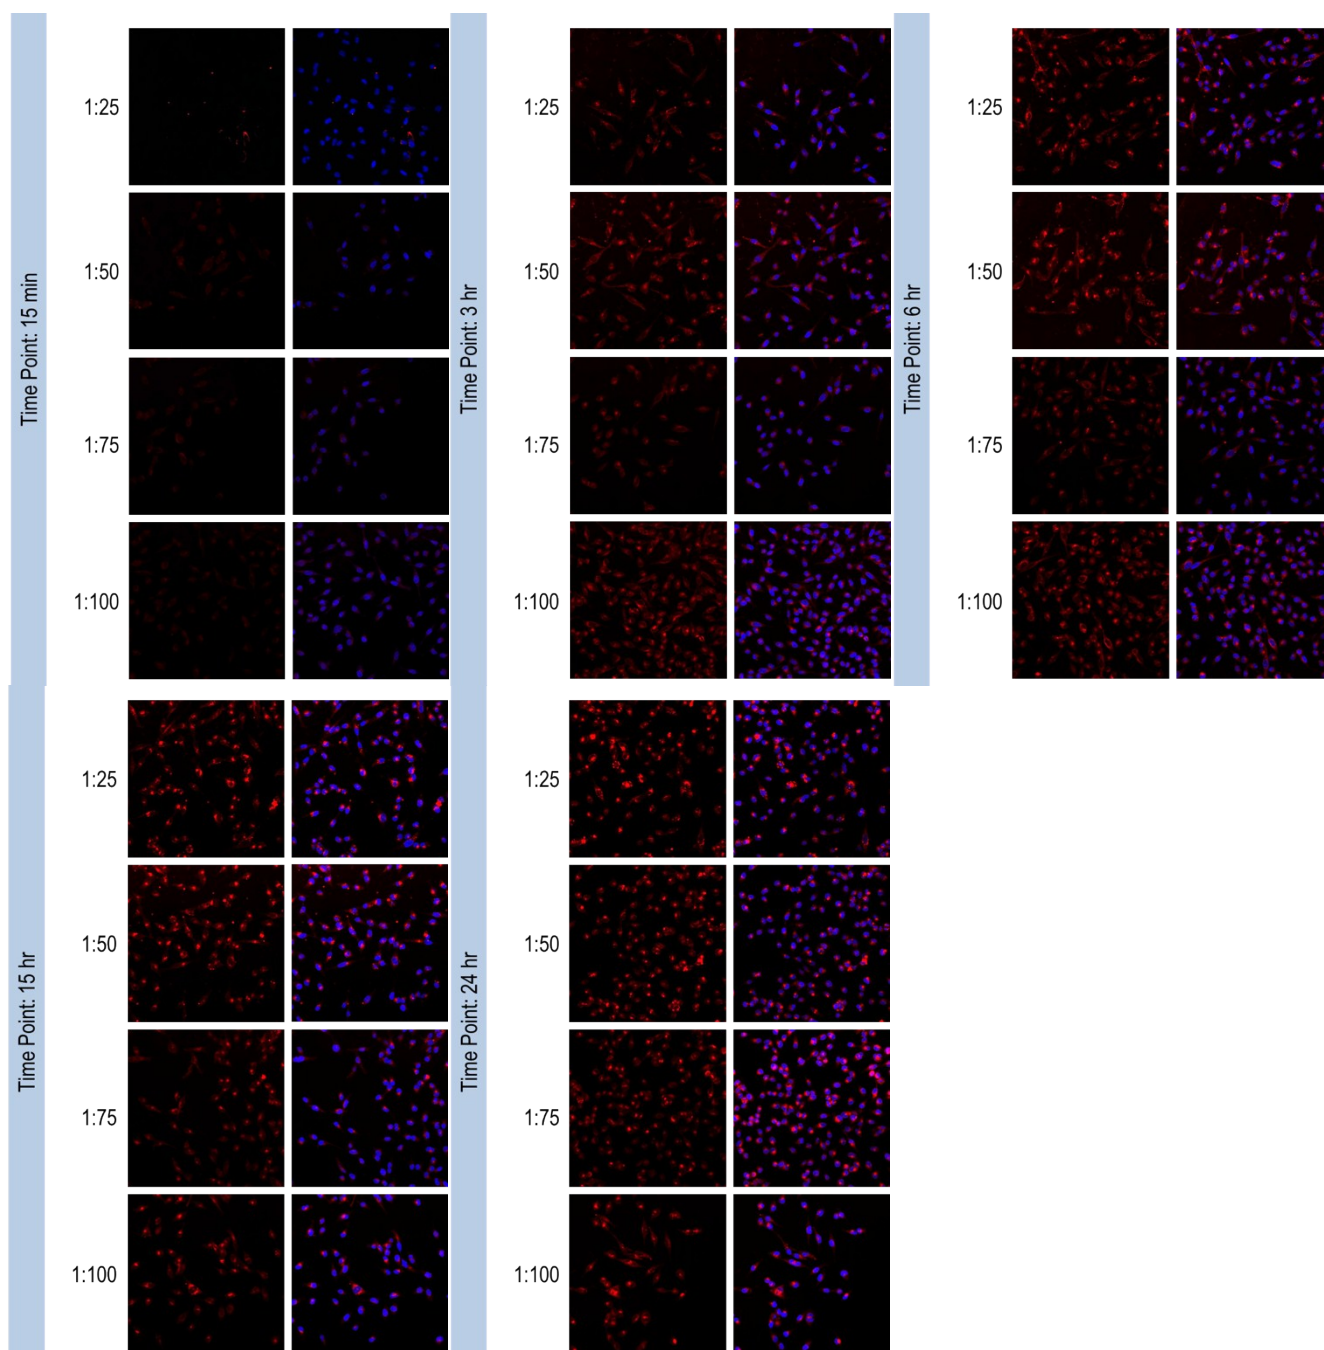

**Figure S7.** HeLa cells were incubated with 5 wt. % Rhodamine B loaded nanogels with a final dye concentration of 23 ng/ $\mu$ L and incubated at different time points (0 min, 15 min, 1 hr, 3 hr, 6 hr, 15 hr, and 24 hr). HeLa cells were fixed using PFA and the nucleus stained with DAPI. Images taken on a confocal microscope at 40X magnification and images were analyzed using ImageJ.



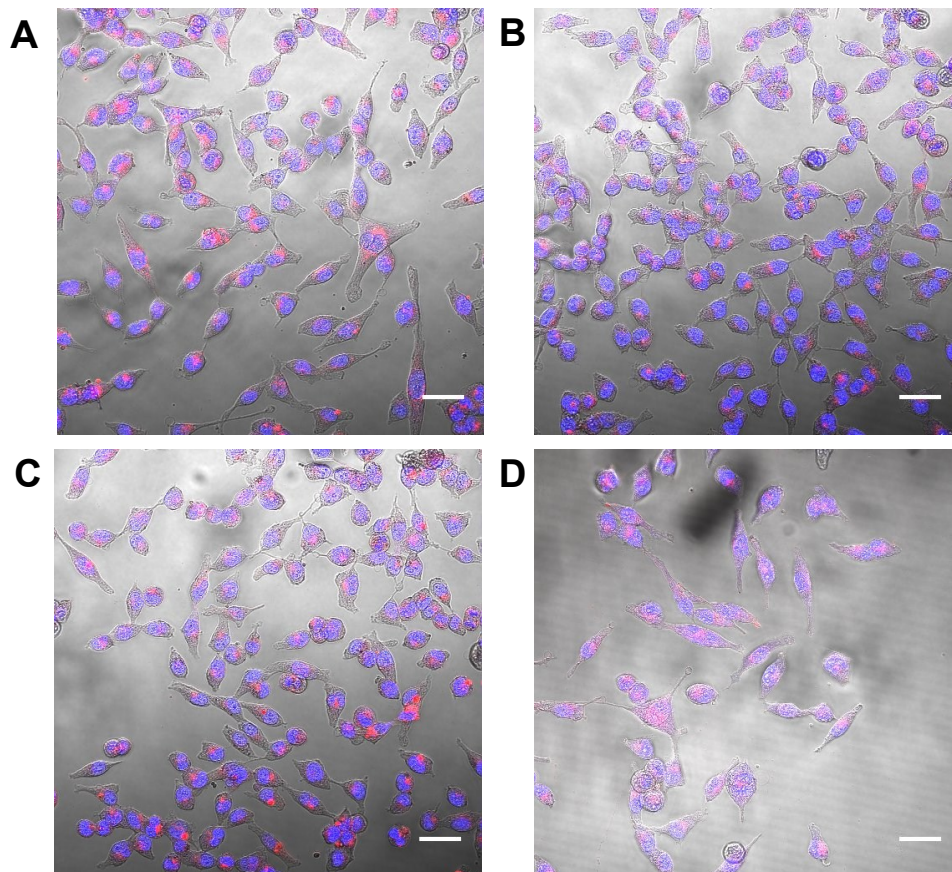

**Figure S8.** HeLa cells were incubated with 5 wt. % Rhodamine B loaded nanogels with a final dye concentration of 23 ng/ $\mu$ L. HeLa cells were fixed using PFA and the nucleus stained with DAPI. Images taken at 40X magnification and scale bars represent 50  $\mu$ m scale. Confocal images of (A) 1:25, (B) 1:50, (C) 1:75, and (D) 1:100, monomer:cross-linker (mol/mol) at the 24 hr time point. An overlay of bright field with Rhodamine B (red) and cell nuclei (blue) is shown.

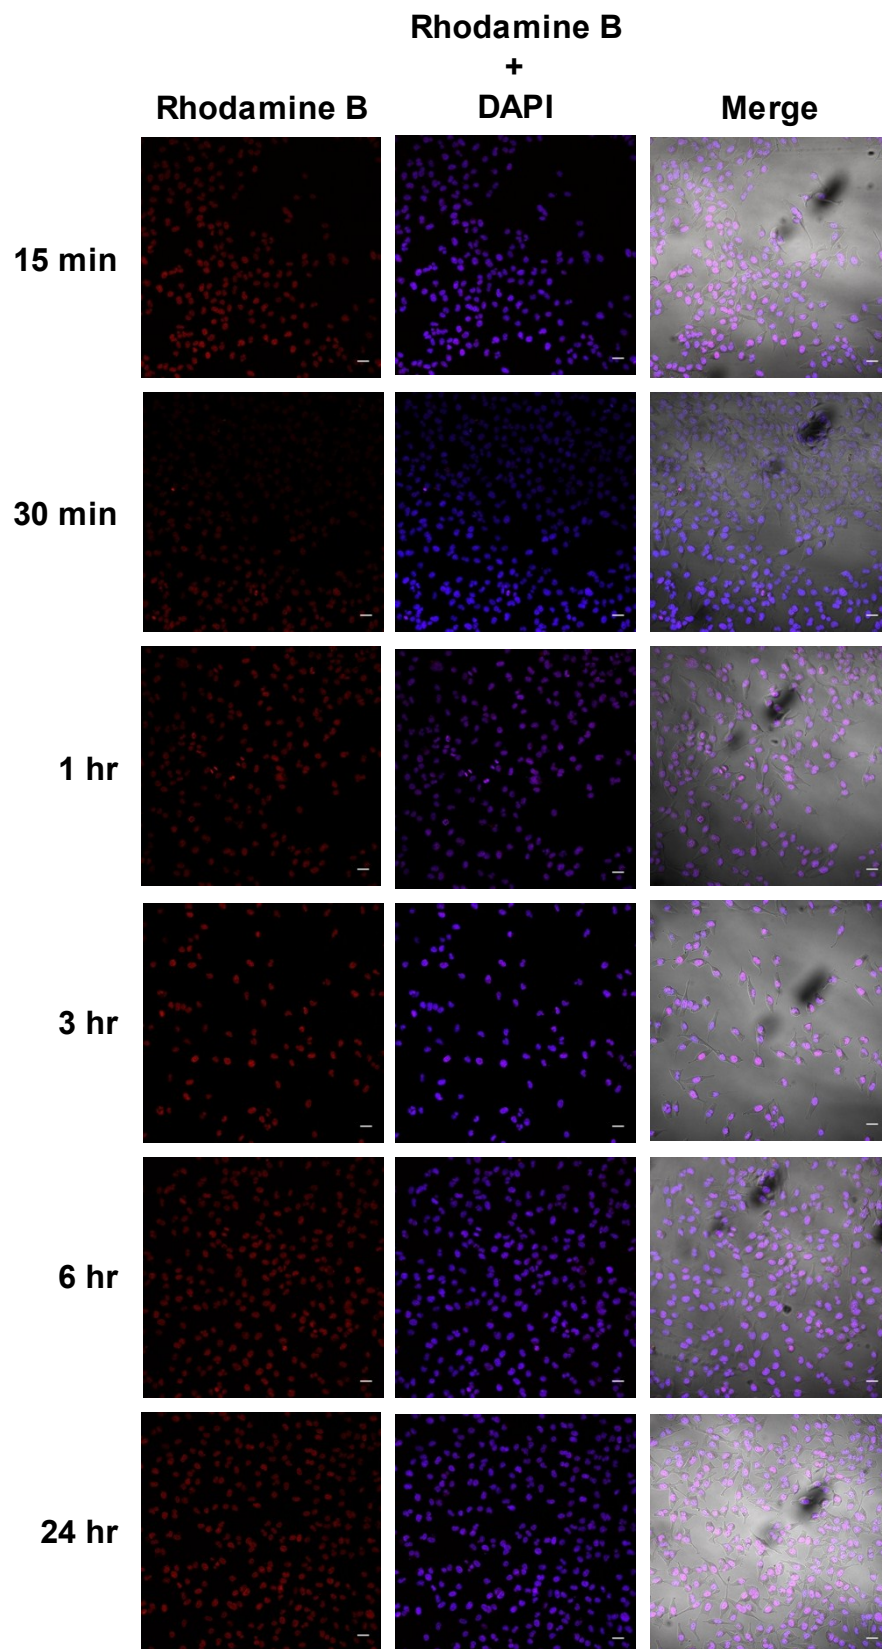

**Figure S9.** Confocal images of HeLa cells were incubated with a free Rhodamine B dye at different time points (0 min, 15 min, 1 hr, 3 hr, 6 hr, and 24 hr) with a final dye concentration of 23 ng/ $\mu$ L. HeLa cells were fixed using PFA and the nucleus stained with DAPI. Images were taken at 20X magnification and scale bars represent 50  $\mu$ m scale.

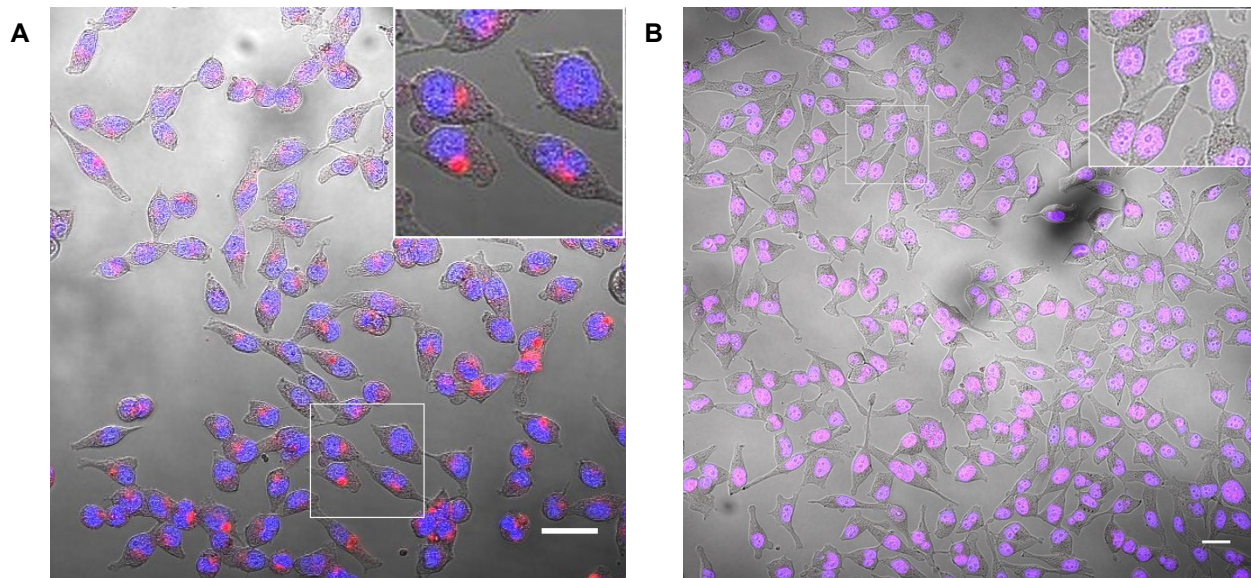

**Figure S10.** (A) HeLa cells were incubated with 5 wt. % Rhodamine B loaded 1:75 monomer:cross-linker (mol/mol) nanogels for a 24 hr time period with a final dye concentration of 23 ng/ $\mu$ L. Images taken at 40X magnification and scale bars represent 50  $\mu$ m scale. (B) HeLa cells were incubated with free Rhodamine B dye for a 24 hr time period with a final dye concentration of 23 ng/ $\mu$ L. Images taken at 20X magnification and scale bars represent 50  $\mu$ m scale. HeLa cells were fixed using PFA and the nucleus stained with DAPI.
